# Supplementary material
Source: PubMed Central journal article supplement (PMC3218212)
Supplement: NIHMS333888-supplement-1.pdf [file NIHMS333888-supplement-1.pdf]

**Supplemental Table. Artifacts on Cine CMR**

|                                                    | ICD / BiV-ICD<br>N=56 Scans | PM<br>N=15 Scans | P-Value |
|----------------------------------------------------|-----------------------------|------------------|---------|
| <u>% of Scans with Any Artifact on Cine CMR</u>    |                             |                  |         |
| Short Axis                                         | 100% (56 / 56)              | 93.3% (14 / 15)  | 0.211   |
| Horizontal Long Axis                               | 26.9% (14 / 52)             | 23.1% (3 / 13)   | 1.0     |
| Vertical Long Axis                                 | 76.1% (35 / 46)             | 33.3% (4 / 12)   | 0.012   |
| <u>Artifacts Size on Cine CMR [cm<sup>2</sup>]</u> |                             |                  |         |
| Short Axis                                         | 197.2±31.2                  | 89.0±25.0        | <0.0001 |
| Horizontal Long Axis                               | 105.3±61.2                  | 35.6±9.1         | 0.001   |
| Vertical Long Axis                                 | 189.2±57.0                  | 66.1±30.3        | 0.0002  |

Values are shown as percentage (N) and mean ± SD.

CMR=cardiac magnetic resonance; ICD=implantable cardioverter defibrillator;

BiV-ICD=biventricular ICD; PM=pacemaker.

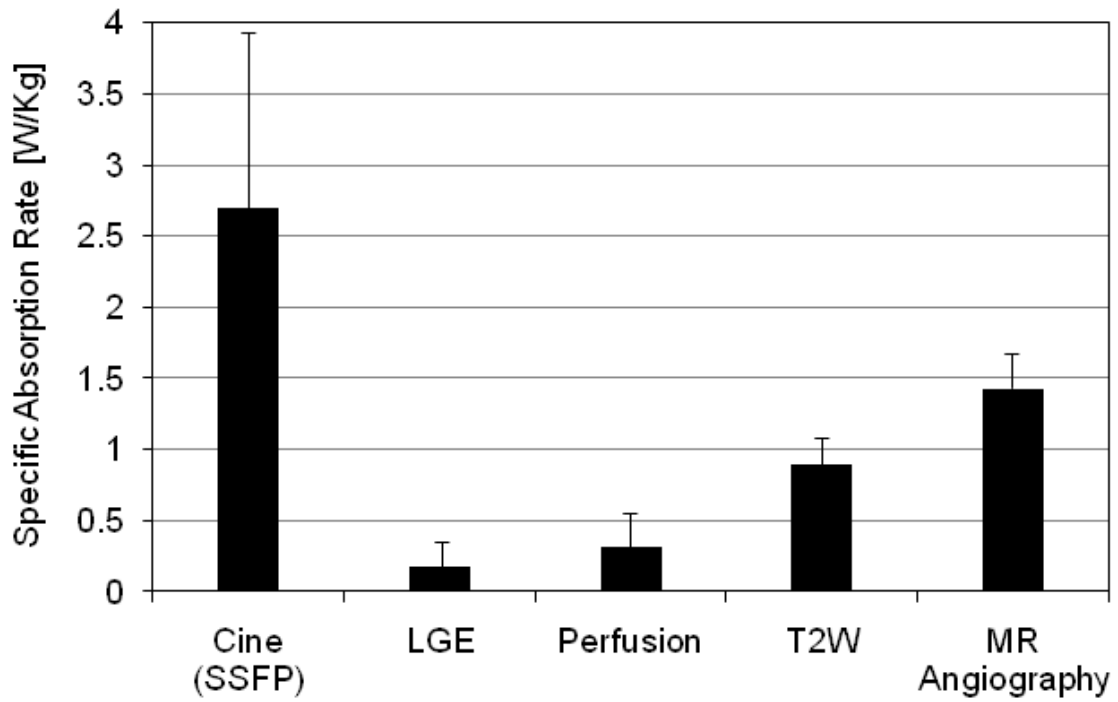

**Supplemental Figure 1. Estimated Whole-Body Averaged Specific Absorption Rate (SAR) for Each Image Sequence**

The estimated whole-body averaged SAR was less than 2.0 W/Kg in most image acquisition sequences except SSFP cine cardiac magnetic resonance.

SSFP=steady state free precession; LGE=late gadolinium enhanced; T2W=T2-weighted; MR=magnetic resonance.

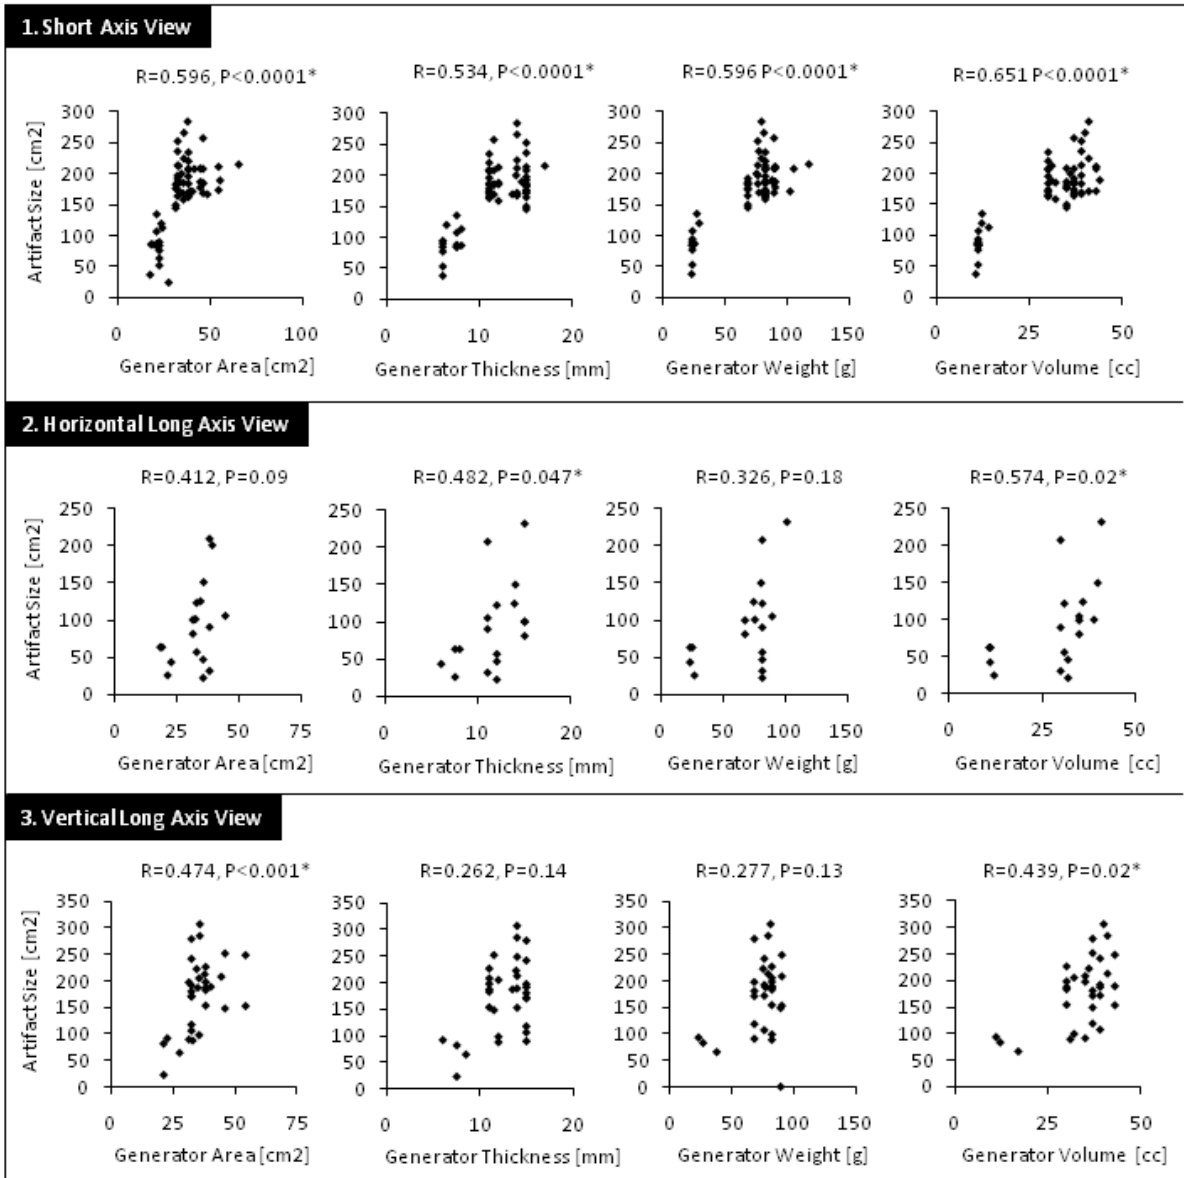

**Supplemental Figure 2. Correlation of Artifact Size on Cine CMR and Generator Dimension.**

The association of artifact size on cine CMR and generator dimensions including area [cm<sup>2</sup>], thickness [mm], weight [g] and volume [ml] were demonstrated with Spearman correlation analysis in SA, HLA and VLA planes, respectively. The strongest correlation was observed in SA planes.

Significant P-value defined as P<0.05 are shown by the asterisk (\*).

SA = short axis; HLA = horizontal long axis; VLA = vertical long axis.

(A) Artifact Effects on Short Axis Plane

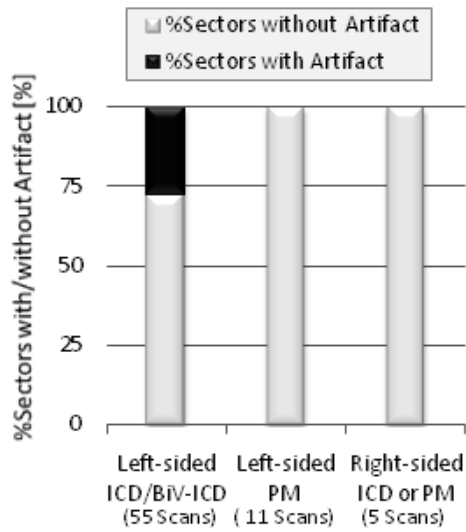

(B) Regional Artifact Effects on Short Axis Plane

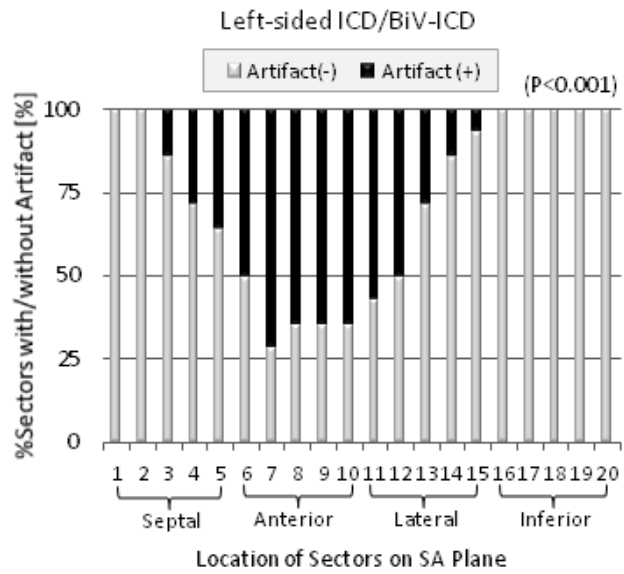

**Supplemental Figure 3.** (A) Artifact effects in short axis plane of cine CMR due to the generator were quantitatively assessed in patients with left and right-sided ICD/BiV-ICD or PM systems. Artifacts on cine CMR were only observed in patients with left-sided ICD/BiV-ICD. (B) Details about the regional artifact effects on short axis plane were demonstrated in patients with left-sided ICD/BiV-ICD. A majority of the artifacts on cine CMR were observed in the anterior regions.
